# Supplementary material for: Enhancement of the cycling performance of Li3V2(PO4)3/C by stabilizing the crystal structure through Zn2+ doping
Source: Royal Society of Chemistry journal article supplement (doi:10.1039/c3cp55495c), 2014-01-01
Supplement: c3cp55495c1.pdf [file c3cp55495c1.pdf]

Supporting Information for

## “Enhancement of cycling performance of $\text{Li}_3\text{V}_2(\text{PO}_4)_3/\text{C}$ by stabilizing the crystal structure through $\text{Zn}^{2+}$ doping”

By: Wenhui Wang,<sup>a†</sup> Jiaolong Zhang,<sup>a†</sup> Zheng Jia,<sup>a</sup> Changsong Dai,<sup>\*a</sup> Yongfeng Hu,<sup>b</sup> Jigang Zhou<sup>b</sup> and Qunfeng Xiao<sup>b</sup>

<sup>a</sup> Harbin Institute of Technology, School of Chemical Engineering and Technology, Xidazhi Street, 150001 Harbin, China. Fax: 86 451 86413721; Tel: 86 451 86413751; E-mail: [changsd@hit.edu.cn](mailto:changsd@hit.edu.cn)

<sup>b</sup> Canadian Light Source Inc., University of Saskatchewan, Saskatoon, SKS7N2V3

† These authors contributed equally to this work.

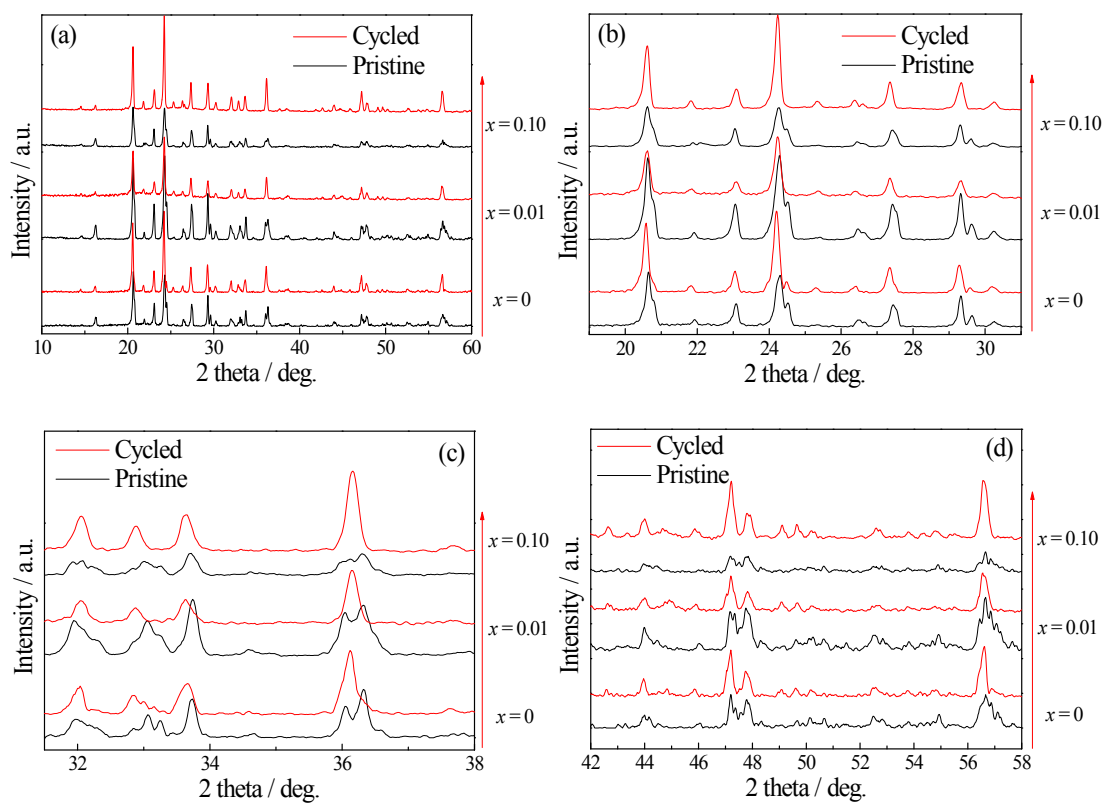

Figure S1 Comparison of XRD patterns of  $\text{Li}_3\text{V}_{2-2/3x}\text{Zn}_x(\text{PO}_4)_3/\text{C}$  ( $x = 0, 0.01$  and  $0.10$ ) before and after cycles
